# Supplementary material for: Synthesis of water-degradable silica nanoparticles from carbamate-containing bridged silsesquioxane precursor
Source: RSC Adv. 2018 Jan 29;8(9):4914–20. doi: 10.1039/c7ra12377a (PMC6133298; doi:10.1039/c7ra12377a)
Supplement: RA-008-C7RA12377A-s001 [file RA-008-C7RA12377A-s001.pdf]

## Electronic Supplementary Information

# Synthesis of water-degradable silica nanoparticles from carbamate-containing bridged silsesquioxane precursor

Zhe Gao,<sup>a</sup> Seyyed Pouya Hadipour Moghaddam,<sup>b, c</sup> Hamidreza Ghandehari,<sup>b, c, d</sup> and Ilya Zharov<sup>a, \*</sup>

### Contents

1. Molybdenum blue colorimetric experiment
2. Supplementary table
3. Supplementary figures

## 1. Molybdenum Blue colorimetric experiment

All the solutions were contained in polyethylene bottles. Standard silicic acid solution was made by diluting sodium silicate solution ( $\text{Na}_2\text{Si}_3\text{O}_7$ , 242.23 g/mol). Three solution stocks were prepared: (1) 3.1 g of ammonium molybdate tetrahydrate dissolved in 50 mL of 1 M sulfuric acid, (2) 6.3 g of oxalic acid dihydrate dissolved in 50 mL of Millipore water, and (3) 1.76 g of ascorbic acid dissolved in 50 mL of Millipore water. Sonication was used to help dissolve the salts. In order to make a calibration curve, the standard silicic solutions with concentrations of  $1.72 \times 10^{-5}$  M,  $8.56 \times 10^{-5}$  M,  $1.703 \times 10^{-4}$  M,  $2.54 \times 10^{-4}$  M,  $3.37 \times 10^{-4}$  M, and  $4.195 \times 10^{-4}$  M were prepared, respectively. 100  $\mu\text{L}$  of solution 1 was added to 2 mL of the sample. After 10 min, the solution became yellow due to the formation of yellow phosphate molybdenum complex. 100  $\mu\text{L}$  of solution 2 was then added and the yellow color faded in 1 min. The addition of 100  $\mu\text{L}$  of solution 3 resulted in a color change to blue. The mixture was allowed to sit for an additional 10 min until the completion of the blue complex formation. The UV-vis spectrum featured a molybdenum blue peak at 810 nm. The concentration of silicic acid was calculated from the calibration curve. 10 mg of 340 nm Stöber SiNPs and ICPTES-sorbitol SiNPs were each separately dispersed in 20 mL of Millipore water. An aliquot of each solution was centrifuged every hour. 100  $\mu\text{L}$  of each supernatant was diluted by 2 mL of water, and the resulting solutions were tested by the procedure aforementioned.

## 2. Supplementary table

**Table S1.** The reaction conditions for fabrication of ICPTES-Sorbitol SiNPs

| Run No. | ICPTES-Sorbitol (mol) $\times 10^{-4}$ | TEOS (mol) $\times 10^{-3}$ | Ethanol (mL) | $\text{NH}_4\text{OH}$ (mL) | Time (hr) |
|---------|----------------------------------------|-----------------------------|--------------|-----------------------------|-----------|
| 1       | 3.0                                    | 0.68                        | 10           | 5                           | 18        |
| 2       | 3.0                                    | 1.4                         | 10           | 5                           | 18        |
| 3       | 3.0                                    | 4.5                         | 10           | 5                           | 18        |
| 4       | 3.0                                    | 4.5                         | 11.25        | 3.75                        | 18        |
| 5       | 3.0                                    | 9.0                         | 12           | 4                           | 18        |
| 6       | 0.30                                   | 0.14                        | 10           | 5                           | 2         |
| 7       | 0.60                                   | 0.28                        | 10           | 5                           | 2         |

### 3. Supplementary figures

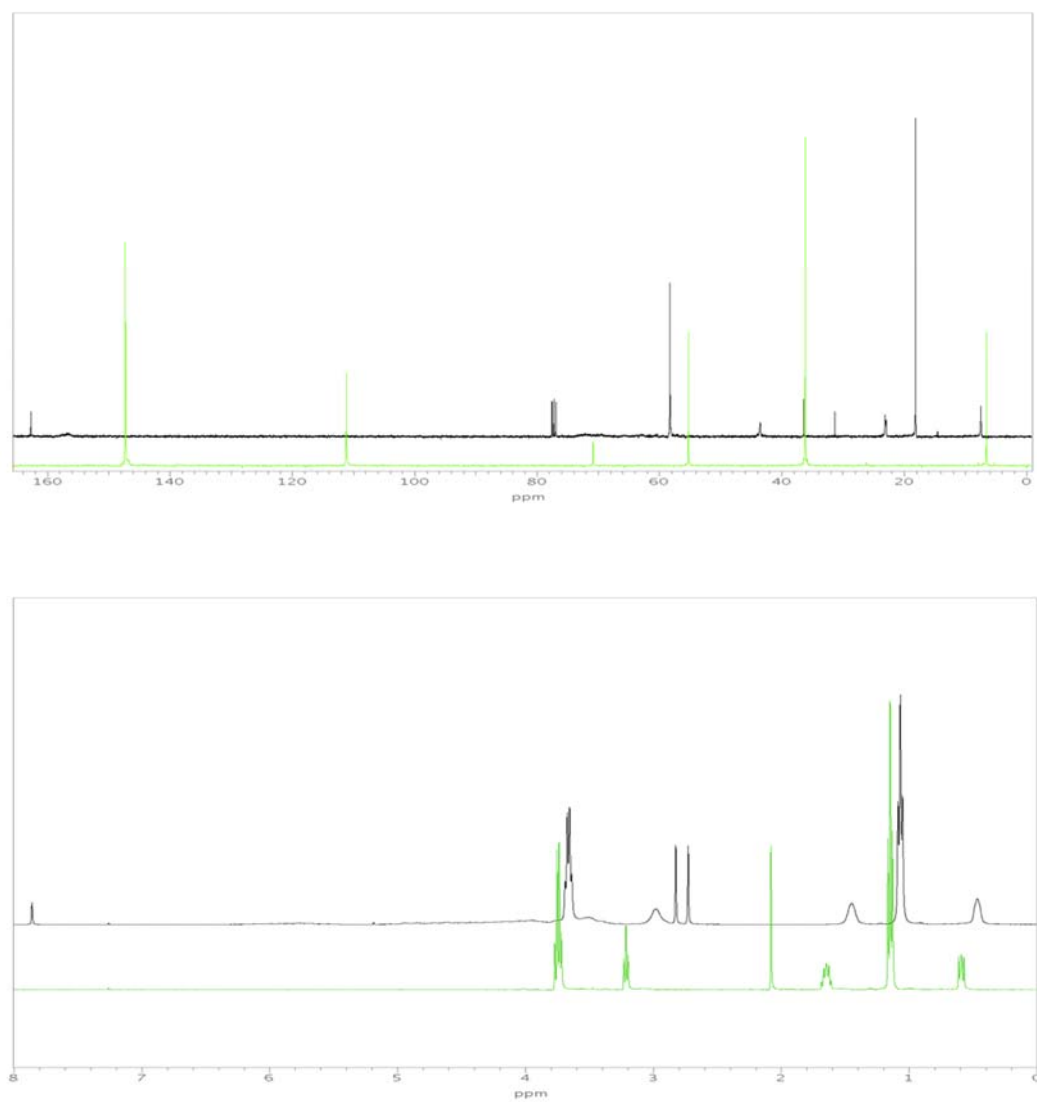

**Fig. S1.**  $^{13}\text{C}$  NMR (Top) and  $^1\text{H}$  NMR (Bottom) overlay spectra of ICPTES (Green) and ICPTES-Sorbitol (Black).

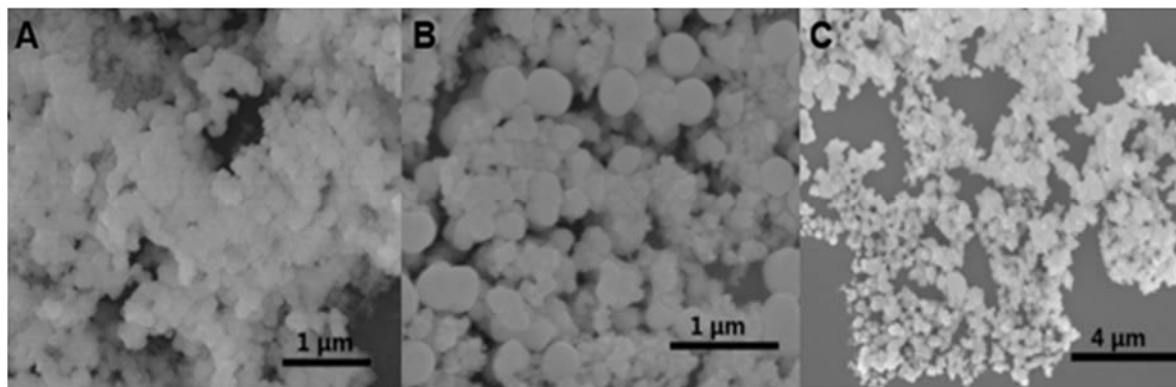

**Fig. S2.** SEM images of ICPTES-Sorbitol SiNPs synthesized with increasing ( $a < b < c$ ) concentration of TEOS.

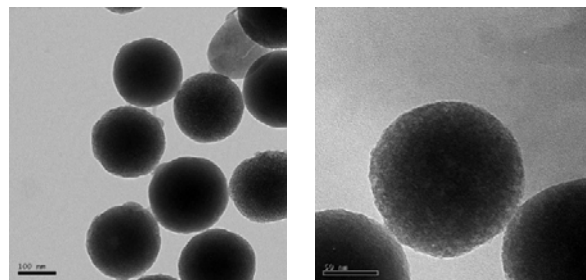

**Fig. S3.** TEM images of the nanoparticles hydrolysis in water (HCl, pH 2) after 3 weeks.

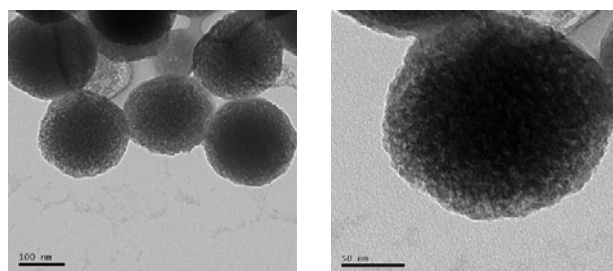

**Fig. S4.** TEM images of the nanoparticles hydrolysis in SBF (pH 7.4) after 3 weeks.

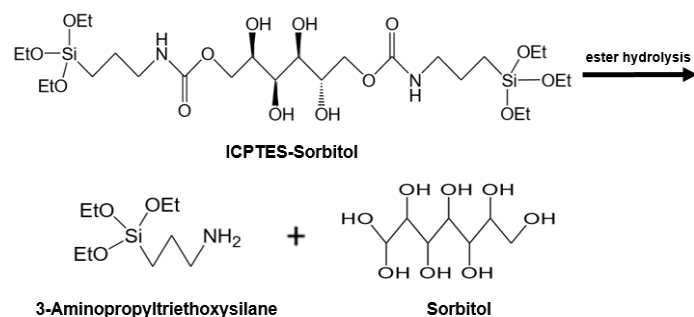

**Fig. S5.** Proposed hydrolysis mechanism of ICPTES-Sorbitol.

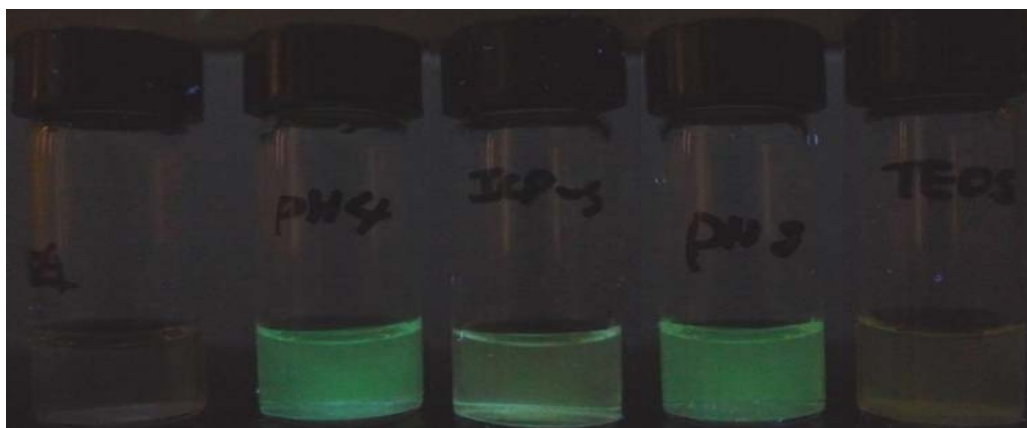

**Fig. S6.** Dansyl chloride reacted with primary amines from the hydrolysis of the nanoparticles (left to right): ICPTES-Sorbitol SiNPs at pH 2, pH 4, pH 7, pH 8, TEOS SiNPs at pH 7.
